# Supplementary material for: Reversible inhibition of the oxidase-like activity of Fe single-atom nanozymes for drug detection
Source: Royal Society of Chemistry journal article supplement (doi:10.1039/d2sc00212d), 2022-01-01
Supplement: d2sc00212d1.pdf [file d2sc00212d1.pdf]

## Supporting information:

### Reversible inhibition of the oxidase-like activity of Fe single-atom nanozymes for drug detection

Weiwei Wu,<sup>ab</sup> Liang Huang,<sup>a</sup> Xinyang Zhu,<sup>ab</sup> Jinxing Chen,<sup>ab</sup> Daiyong  
Chao,<sup>a</sup> Minghua Li,<sup>a</sup> Shuangli Wu<sup>ab</sup> and Shaojun Dong<sup>\*ab</sup>

<sup>a</sup>State Key Laboratory of Electroanalytical Chemistry, Changchun Institute  
of Applied Chemistry, Chinese Academy of Sciences, Changchun, Jilin  
130022, China.

<sup>b</sup>University of Science and Technology of China, Hefei, Anhui 230026,  
China.

## Materials

Zinc acetate dihydrate ( $\text{Zn}(\text{OAc})_2 \cdot 2\text{H}_2\text{O}$ ), 1,10-Phenanthroline  
monohydrate, 4-Acetamidophenol (AMP) and 3,3',5,5'-  
tetramethylbenzidine (TMB) were purchased from Aladdin. Iron (II)  
phthalocyanine (FePc) was obtained from Energy Chemical (Shanghai)  
Co., Ltd. Sodium chloride (NaCl), ethanol, Dimethyl sulfoxide (DMSO)  
and hydrochloric acid were bought from XiLong SCIENTIFIC. Co., Ltd.  
Paracetamol tablets were bought from Fuzhou Neptunus Fuyao  
Pharmaceuticals Co., Ltd. All the chemicals were used without further  
purification. Ultrapure water ( $\geq 18.2 \text{ M}\Omega \text{ cm}$ ) was used throughout the  
study.

## Apparatus and characterization

TEM images were obtained with a HITACHI 600 transmission electron microscope operated at 100 kV. SEM images were collected via a Zeiss Gemini Sigma 300 SEM instrument. UV-vis absorption measurements were carried out on an Agilent Cary 60 (Varian) UV-vis-near-infrared (NIR) spectrometer. X-ray photoelectron spectroscopy (XPS) measurements were performed on an ESCALABMKII (VG Co., UK) spectrometer with an Al K $\alpha$  excitation source. X-ray diffraction (XRD) characterization was carried out by D8 ADVANCE (Bruker, Germany) diffractometer using Cu K radiation ( $\lambda=1.54 \text{ \AA}$ ). Aberration-corrected high angle annular dark-field scanning transmission electron microscope (HAADF-STEM) images were taken using an FEI Themis Z instrument equipped with a spherical aberration corrector. X-ray absorption fine structure spectra (XAFS) were obtained at 1W1B-XAFS station at Beijing Synchrotron Radiation Facility (P. R. China). Raman spectra were recorded on a LabRAM HR800 confocal Raman microscope (Horiba Jobin Yvon) with a laser excitation of 532 nm. Electron paramagnetic resonance (EPR) experiments were carried out on Bruker EMXnano EPR spectrometer.

## Supporting Figures

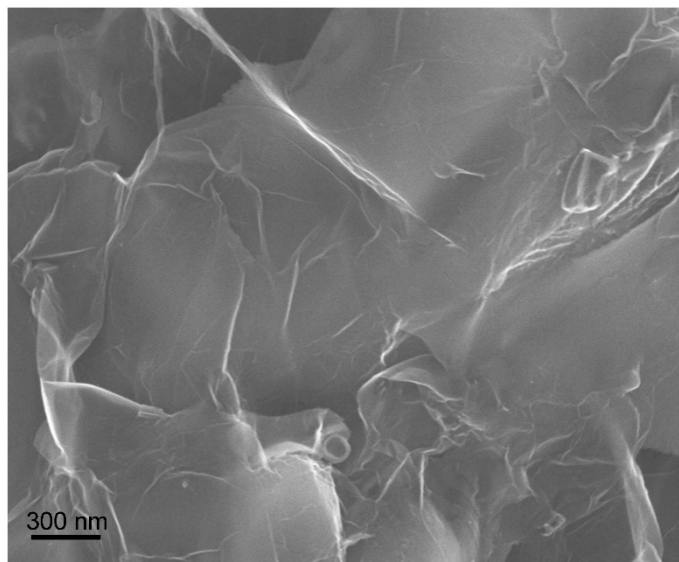

Figure S1. SEM image of Fe-SANs.

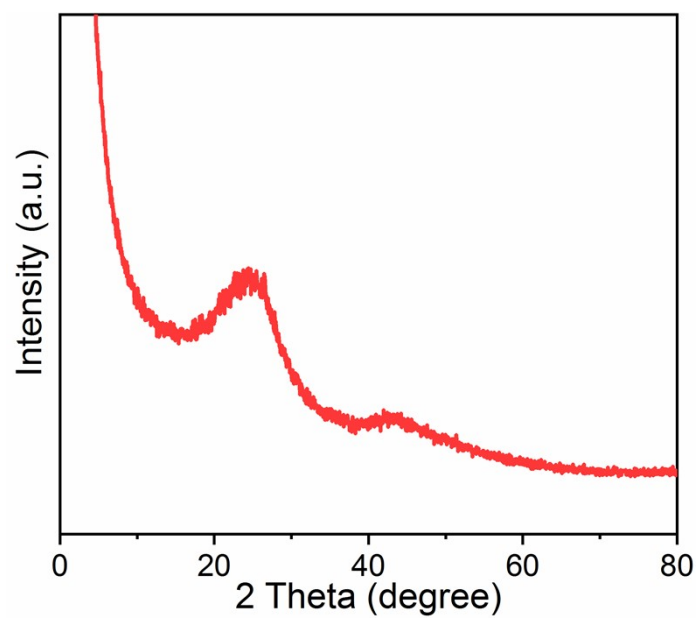

Figure S2. XRD patterns of Fe-SANs.

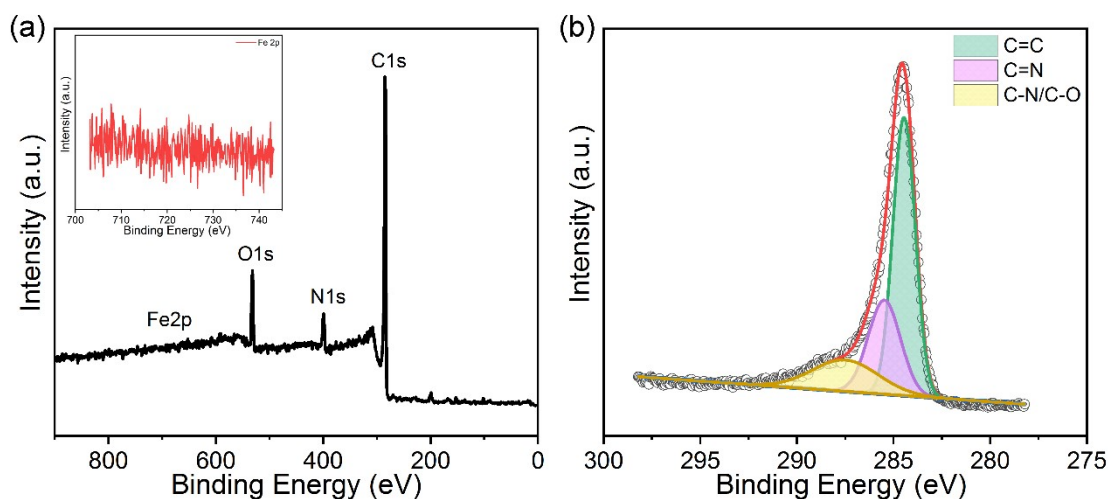

Figure S3. (a) XPS survey scan (inset: Fe 2p spectra) and (b) C 1s spectra of Fe-SANs.

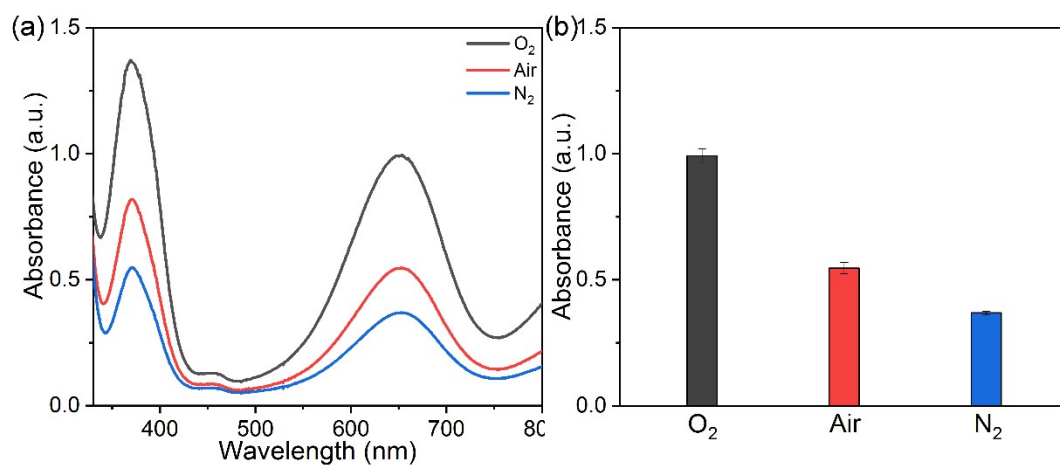

Figure S4. (a) UV-vis absorption spectra and (b) absorbance at 652 nm of TMB in the presence of Fe-SANs in O<sub>2</sub>, N<sub>2</sub> and air-saturated buffer.

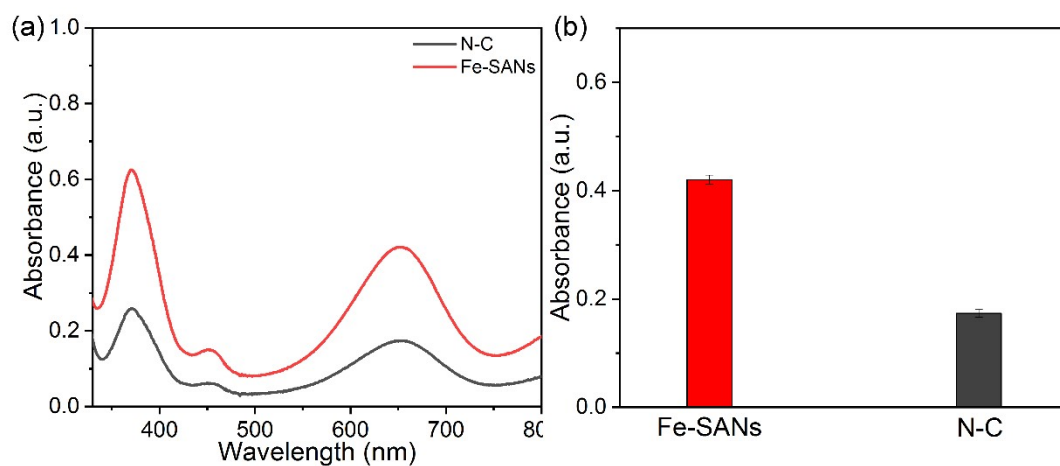

Figure S5. (a) UV-vis absorption spectra and (b) absorbance at 652 nm of TMB in the presence of Fe-SANs and N-C nanosheets in air-saturated buffer.

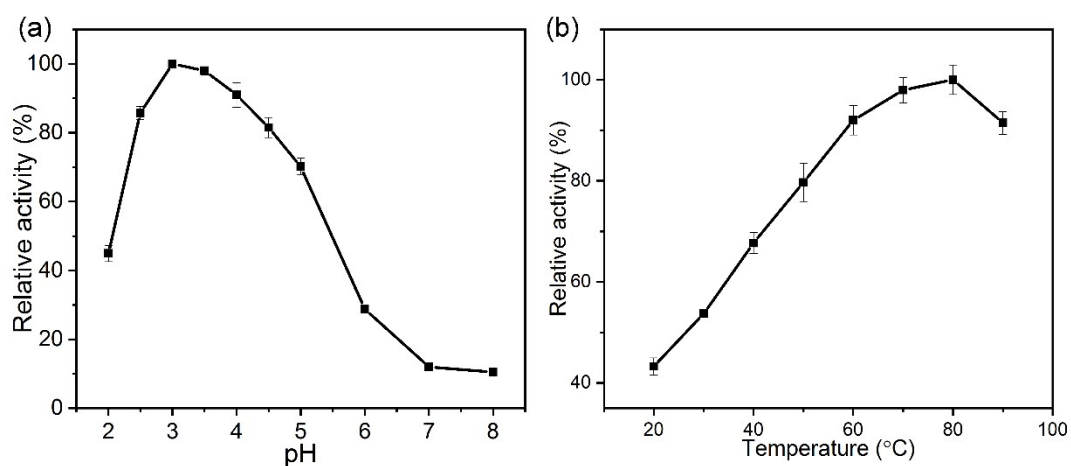

Figure S6. The relative activity of Fe-SANs at different (a) pH and (b) temperatures.

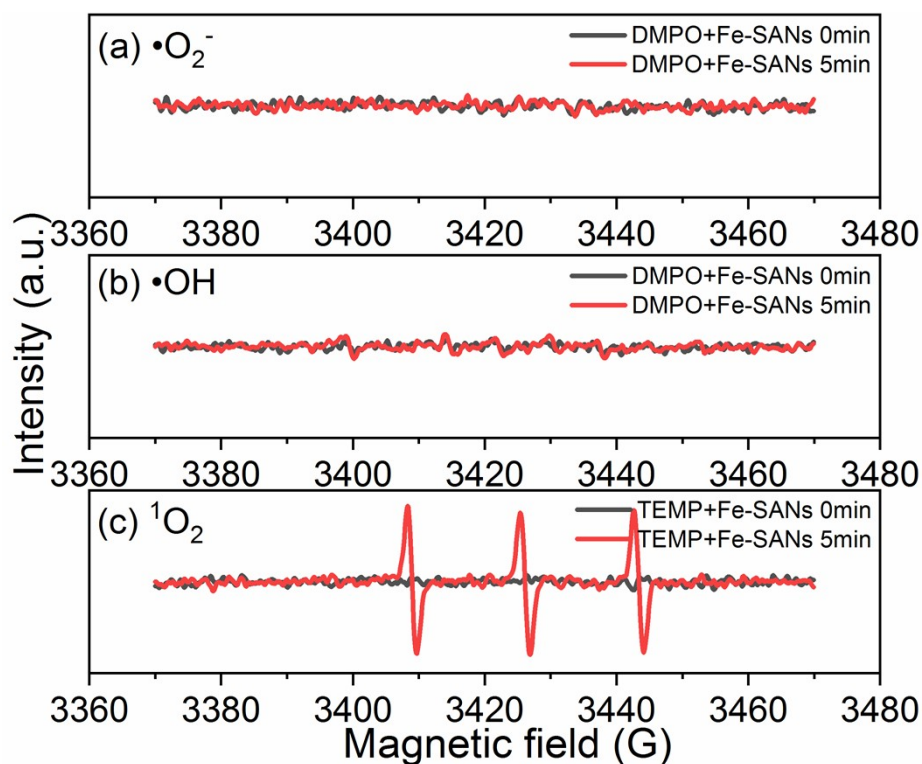

Figure S7. The ESR spectra of (a) DMPO/Fe-SANs aqueous suspension, (b) DMPO/Fe-SANs in methanol and (c) TEMP/ Fe-SANs aqueous suspension.

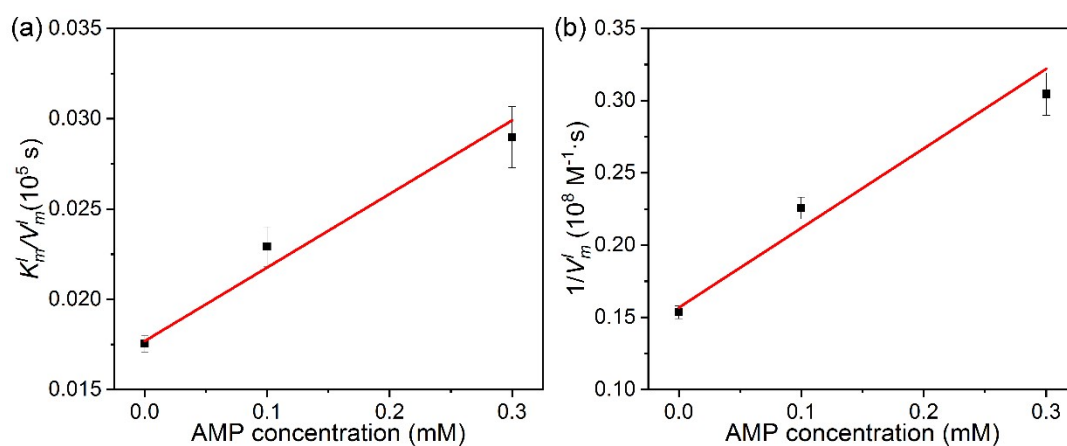

Figure S8. (a) The slopes ( $K_m^I/V_m^I$ ) and (b) intercepts ( $1/V_m^I$ ) of Lineweaver-Burk plots of Fe-SANs for TMB at different AMP concentrations.

Table S1. Comparison of the kinetic parameters of Fe-SANs with other iron-based nanozymes.

| Sample                     | [E]<br>(M)            | $K_m$<br>(mM) | $V_m$<br>( $\times 10^{-8} \text{M s}^{-1}$ ) | $k_{cat}$<br>( $\text{s}^{-1}$ ) | $k_{cat}/K_m$<br>( $\text{mM}^{-1} \text{s}^{-1}$ ) | Ref       |
|----------------------------|-----------------------|---------------|-----------------------------------------------|----------------------------------|-----------------------------------------------------|-----------|
| Fe-SANs                    | $5.00 \times 10^{-8}$ | 0.114         | 6.51                                          | 1.30                             | 11.40                                               | This work |
| FeN <sub>5</sub><br>SA/CNF | $1.07 \times 10^{-6}$ | 0.148         | 75.80                                         | 0.71                             | 4.79                                                | 1         |
| Fe SAEs                    | $1.07 \times 10^{-6}$ | 0.130         | 2.25                                          | 0.02                             | 0.16                                                | 2         |
| Fe-N/C                     | $7.36 \times 10^{-6}$ | 0.940         | 59.80                                         | 0.08                             | 0.09                                                | 3         |
| Fe-N/C                     | $6.79 \times 10^{-5}$ | 0.205         | 54.10                                         | $7.97 \times 10^{-3}$            | 0.04                                                | 4         |
| Pero-<br>nanozyme          | $1.21 \times 10^{-5}$ | 0.550         | 4.53                                          | $3.76 \times 10^{-3}$            | 0.01                                                | 5         |
| Fe-N-C<br>SACs             |                       | 1.810         | 0.06                                          |                                  |                                                     | 6         |
| Fe-N/C-<br>CNTs            |                       | 0.620         | 52.60                                         |                                  |                                                     | 7         |
| Fe-N-C-<br>400             |                       | 0.269         | 33.80                                         |                                  |                                                     | 8         |
| Fe <sub>3</sub> C/N-       |                       | 0.225         | 32.50                                         |                                  |                                                     | 9         |

| C               |       |      |    |
|-----------------|-------|------|----|
| FeBi-NC         | 0.210 | 7.00 | 10 |
| MOF(Co<br>/2Fe) | 0.199 | 0.39 | 11 |

Table S2. Kinetic parameters of Fe-SANs toward TMB at different AMP concentration.

| AMP concentration<br>(mM) | $K_m$<br>(mM) | $V_m$<br>( $\times 10^{-8} \text{M s}^{-1}$ ) |
|---------------------------|---------------|-----------------------------------------------|
| 0                         | 0.114         | 6.51                                          |
| 0.1                       | 0.102         | 4.43                                          |
| 0.3                       | 0.095         | 3.28                                          |

Table S3. Determination of AMP in paracetamol tablets.

| Original amount<br>(mM) | Added<br>(mM) | Found<br>(mM) | Recovery<br>(%) | RSD<br>(%) |
|-------------------------|---------------|---------------|-----------------|------------|
|                         | 0.125         | 0.214         | 92.0            | 3.4        |
| 0.099                   | 0.175         | 0.292         | 110.3           | 5.7        |
|                         | 0.275         | 0.389         | 105.5           | 1.4        |

### References:

1. L. Huang, J. Chen, L. Gan, J. Wang and S. Dong, *Sci. Adv.*, 2019, **5**: eaav5490.



2. C. Zhao, C. Xiong, X. Liu, M. Qiao, Z. Li, T. Yuan, J. Wang, Y. Qu, X. Wang, F. Zhou, Q. Xu, S. Wang, M. Chen, W. Wang, Y. Li, T. Yao, Y. Wu and Y. Li, *Chem. Commun.*, 2019, **55**, 2285-2288.
3. Q. Chen, S. Li, Y. Liu, X. Zhang, Y. Tang, H. Chai and Y. Huang, *Sens. Actuators, B*, 2020, **305**, 127511.
4. W. Jing, X. Cui, F. Kong, W. Wei, Y. Li, L. Fan and X. Li, *Analyst*, 2021, **146**, 207-212.
5. J. Xi, R. Zhang, L. Wang, W. Xu, Q. Liang, J. Li, J. Jiang, Y. Yang, X. Yan, K. Fan and L. Gao, *Adv. Funct. Mater.*, 2021, **31**, 2007130.
6. Y. Wu, L. Jiao, X. Luo, W. Xu, X. Wei, H. Wang, H. Yan, W. Gu, B. Z. Xu, D. Du, Y. Lin and C. Zhu, *Small*, 2019, **15**, 1903108.
7. Y. Wang, Z. Zhang, G. Jia, L. Zheng, J. Zhao and X. Cui, *Chem. Commun.*, 2019, **55**, 5271-5274.
8. Y. Xu, J. Xue, Q. Zhou, Y. Zheng, X. Chen, S. Liu, Y. Shen and Y. Zhang, *Angew.Chem.Int.Ed.*, 2020, **59**, 14498-14503.
9. N. Song, F. Ma, Y. Zhu, S. Chen, C. Wang and X. Lu, *ACS Sustainable Chem. Eng.*, 2018, **6**, 16766-16776.
10. Q. Chen, Y. Liu, Y. Lu, Y. Hou, X. Zhang, W. Shi and Y. Huang, *J. Hazard. Mater.*, 2022, **422**, 126929.
11. H. Yang, R. Yang, P. Zhang, Y. Qin, T. Chen and F. Ye, *Microchim. Acta*, 2017, **184**, 4629-4635.
